# Supplementary material
Source: Springer Nature journal article supplement (https://www.springermedizin.de/resource/supplementary/12865_2008_235_MOESM9_ESM.pdf/9427566)

rat hepatic stellate cells

---

IL1- $\alpha$       0      10      30      60      min

pT423-PAK1

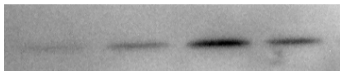

GAPDH

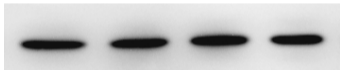

pT212-PAK1

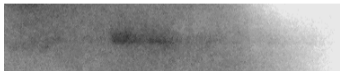

GAPDH

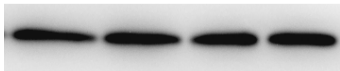

Supplement: MOESM9 [file 9427566]
